# Supplementary material for: n-Butanol production in Saccharomyces cerevisiae is limited by the availability of coenzyme A and cytosolic acetyl-CoA
Source: Springer Nature journal article supplement (doi:10.1186/s13068-016-0456-7), 2016-02-24
Supplement: MOESM1 [file 13068_2016_456_MOESM1_ESM.pdf]

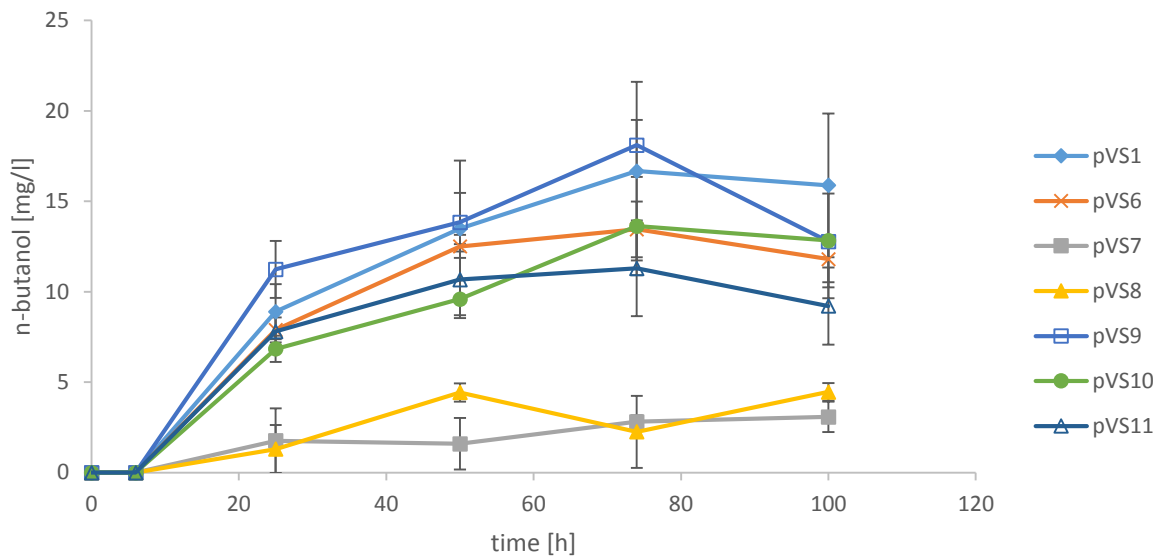

**Fig. S1: n-Butanol production with different variants of acetoacetyl-CoA derived n-butanol pathways in *S. cerevisiae* strain CEN.PK113-5D.** The n-butanol concentrations of semi-anaerobic fermentations in SMD medium within 100 h are shown. Six different variants are compared: pVS1 (diamond), pVS6 (cross), pVS7 (square), pVS8 (triangle), pVS9 (open square), pVS10 (circle), pVS11 (open triangle). Error bars represent the standard deviation of three independent replicates.

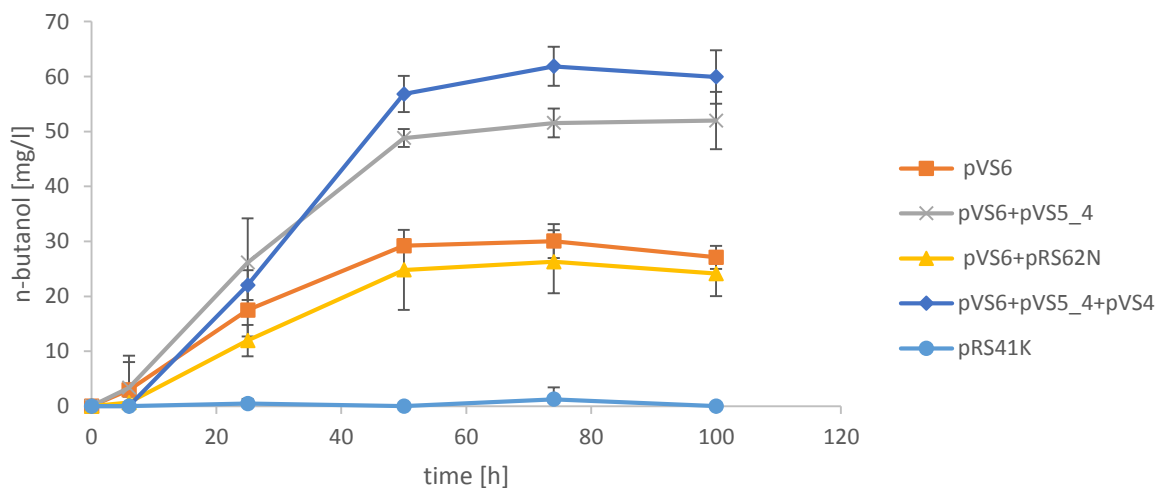

**Fig. S2: Comparison of n-butanol production with and without overexpression of *coaA* (pVS5\_4) and *adhE*<sup>A267T/E568K</sup> (pVS4) in VSY0 ( $\Delta adh1-5$ ).** Different combinations of plasmids were used for fermentations in SMD medium: pVS6 (square), pVS6+pVS5\_4 (cross), as a control pVS6 with an empty vector instead of pVS5\_4 (triangle), pVS6+pVS5\_4+pVS4 (diamond) and an empty vector (circle). Error bars represent the standard deviation of three independent replicates.

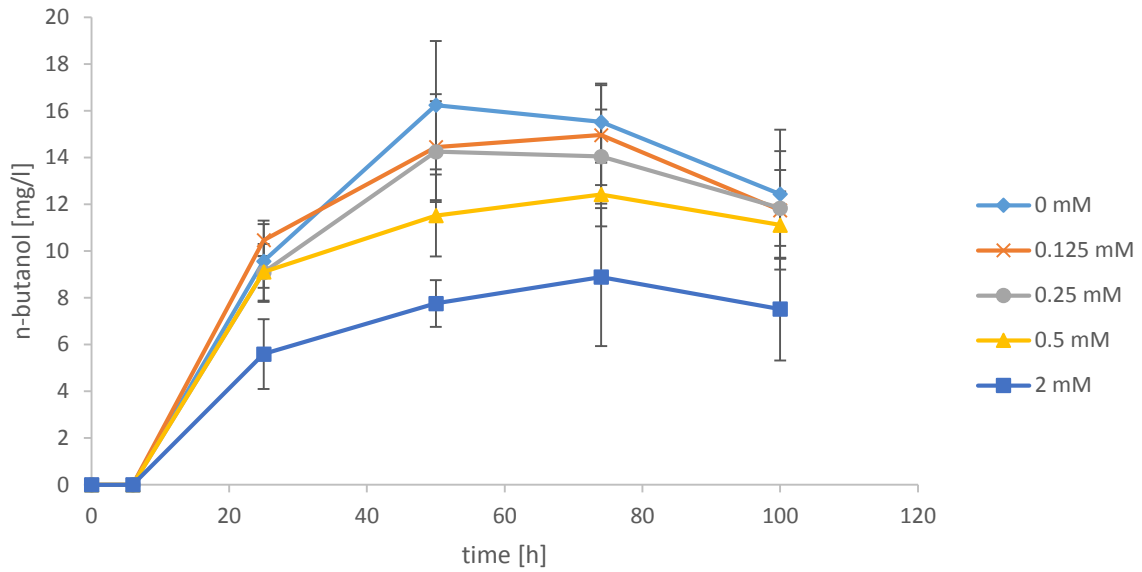

**Fig. S3: n-Butanol production with n-butanol pathway (pVS6) and *FEN2* overexpression behind the *MET25* promoter (pVS5\_6) in CEN.PK113-5D with addition of methionine.** Five different concentrations of methionine were added to SMD medium: 0 mM (diamond), 0.125 mM (cross), 0.25 mM (circle), 0.5 mM (triangle), 2 mM (square). Error bars represent the standard deviation of three independent replicates.

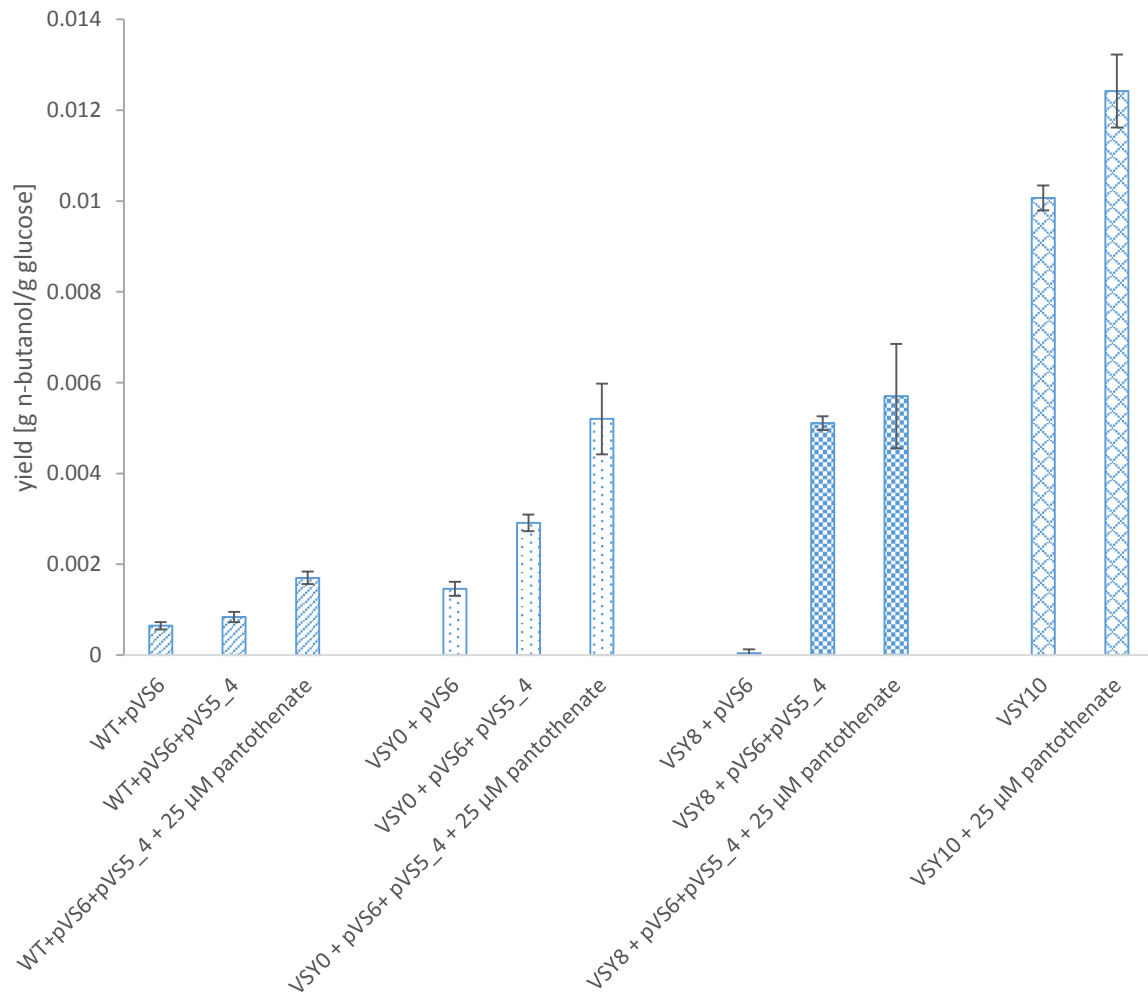

**Fig. S4: Comparison of n-butanol yields of different strains.** The amount of n-butanol after 74 h is calculated per g consumed glucose after 74 h of semi-anaerobic fermentations in SMD medium. Compared are fermentations of the wildtype CEN.PK113-5D, VSY0 ( $\Delta adh1-5$ ), and VSY8 ( $\Delta adh1-5$  *sfa1* with *adhE*<sup>A267T/E568K</sup>) with plasmid pVS6 (n-butanol pathway), with or without *coaA* overexpression (pVS5\_4), and strain VSY10 ( $\Delta adh1-6$  *sfa1* *gpd2*, with n-butanol pathway genes of pVS6, *coaA* and *adhE*<sup>A267T/E568K</sup>), in the absence or presence of additional 25 µM pantothenate, in SMD medium. Error bars represent the standard deviation of three independent replicates and a statistical analysis is shown in Tab. S4.

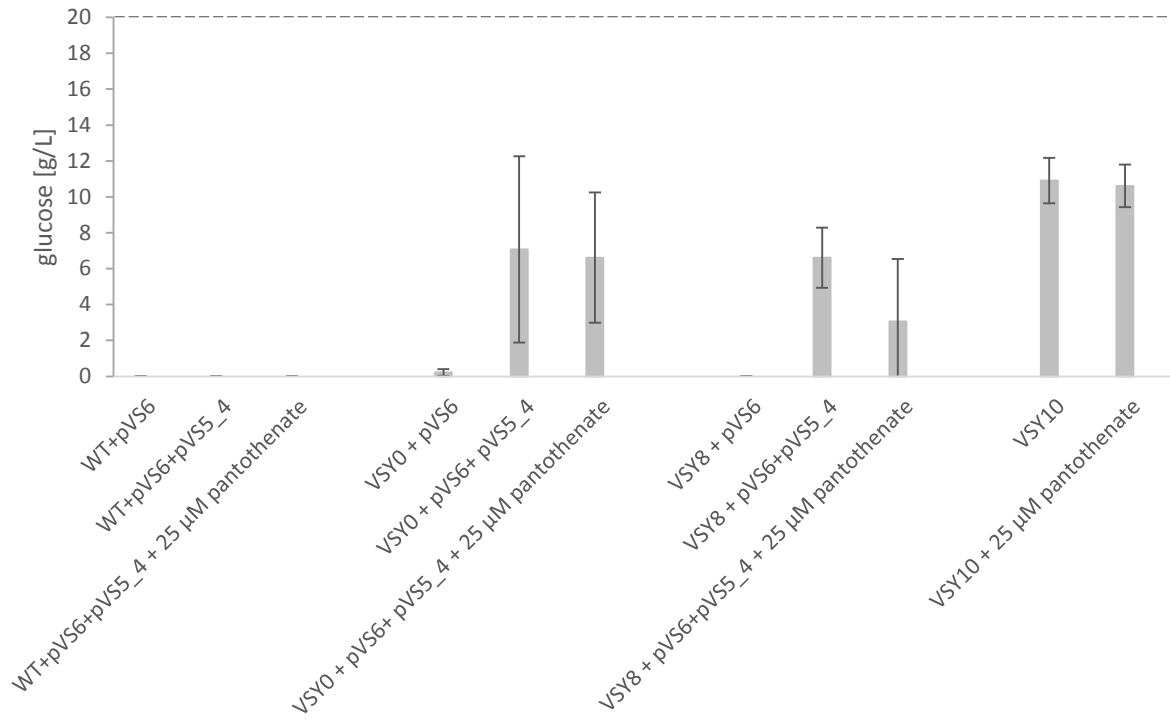

**Fig. S5: Consumption of glucose in semi-anaerobic fermentations started with 20 g/L glucose.** Residual glucose after 74 h fermentations in SMD medium is shown. Compared are fermentations of the wildtype CEN.PK113-5D, VSY0 ( $\Delta adh1-5$ ), and VSY8 ( $\Delta adh1-5 sfa1$  with  $adhE^{A267T/E568K}$ ) with plasmid pVS6 (n-butanol pathway), with or without *coaA* overexpression (pVS5\_4), and strain VSY10 ( $\Delta adh1-6 sfa1 gpd2$ , with n-butanol pathway genes of pVS6, *coaA* and  $adhE^{A267T/E568K}$ ), in the absence or presence of additional 25 µM pantothenate, in SMD medium. Error bars represent the standard deviation of three independent replicates.

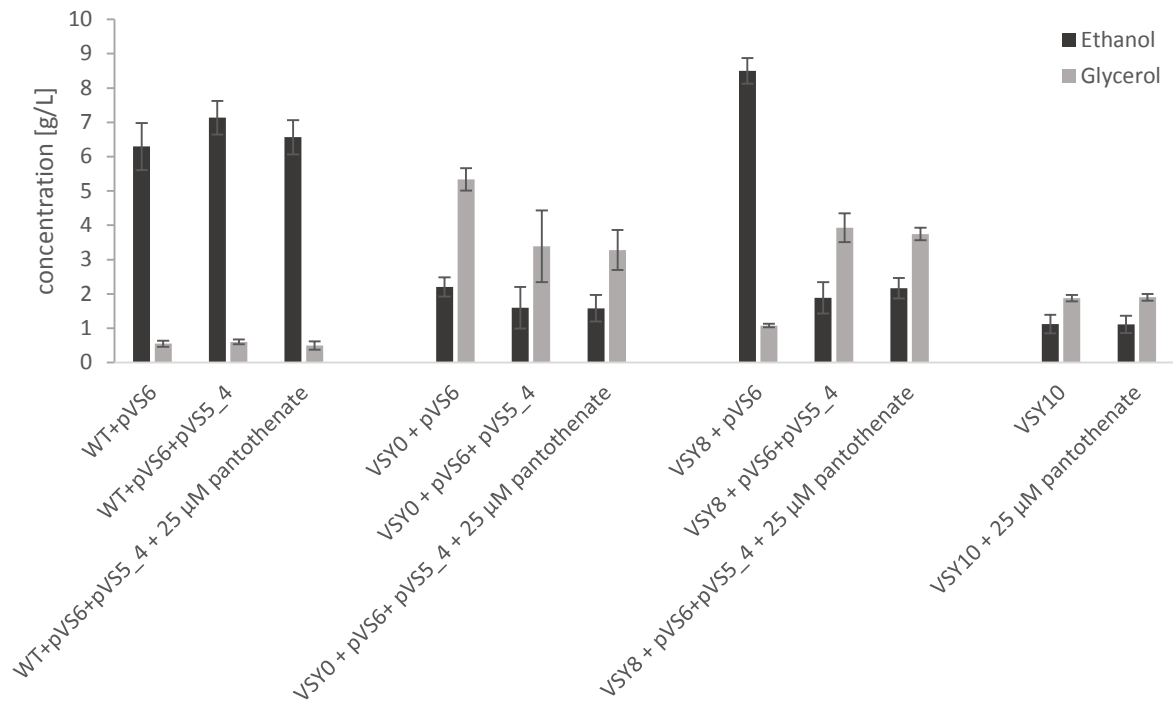

**Fig. S6: Ethanol and glycerol production in semi-anaerobic fermentations.** The amounts of ethanol and glycerol after 74 h fermentations in SMD medium are shown. Compared are fermentations of the wildtype CEN.PK113-5D, VSY0 ( $\Delta adh1-5$ ), and VSY8 ( $\Delta adh1-5$  *sfa1* with *adhE*<sup>A267T/E568K</sup>) with plasmid pVS6 (n-butanol pathway), with or without *coaA* overexpression (pVS5\_4), and strain VSY10 ( $\Delta adh1-6$  *sfa1* *gpd2*, with n-butanol pathway genes of pVS6, *coaA* and *adhE*<sup>A267T/E568K</sup>), in the absence or presence of additional 25 µM pantothenate, in SMD medium. Error bars represent the standard deviation of three independent replicates.

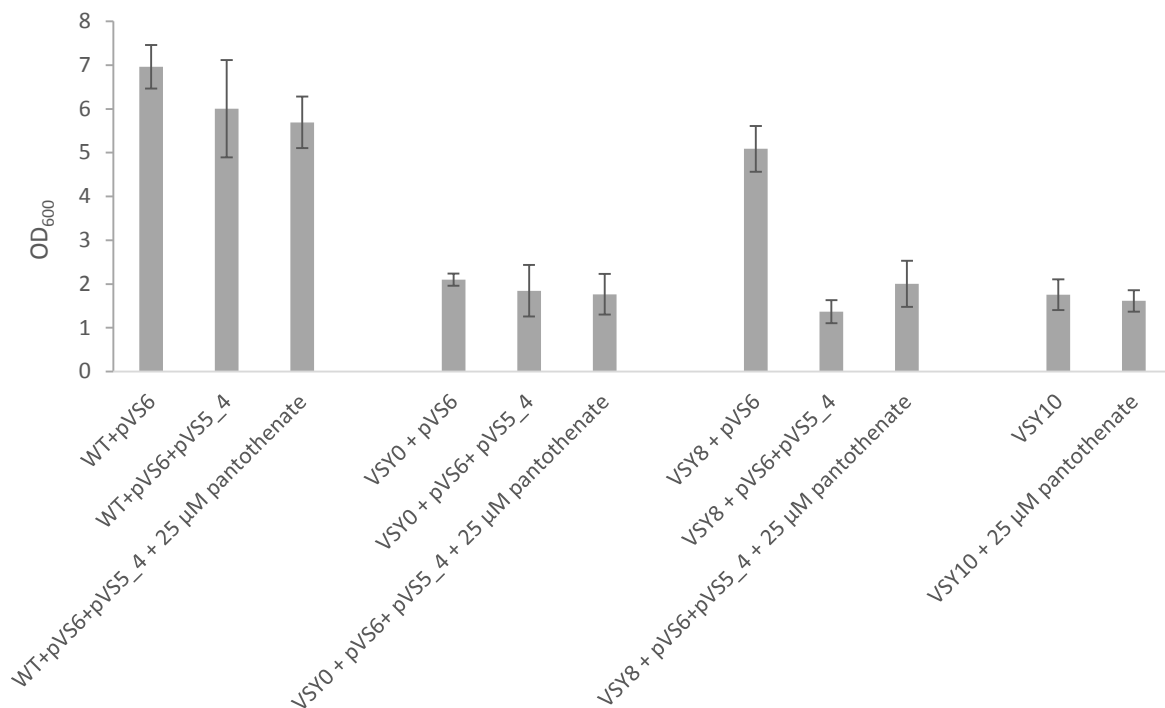

**Fig. S7: OD<sub>600</sub> after 74 h in semi-aerobic fermentations.** The OD<sub>600</sub> after 74 h fermentations, that were started with an OD<sub>600</sub> of 0.3 in SMD medium are shown. Compared are fermentations of the wildtype CEN.PK113-5D, VSY0 ( $\Delta adh1-5$ ), and VSY8 ( $\Delta adh1-5 sfa1$  with  $adhE^{A267T/E568K}$ ) with plasmid pVS6 (n-butanol pathway), with or without *coaA* overexpression (pVS5\_4), and strain VSY10 ( $\Delta adh1-6 sfa1 gpd2$ , with n-butanol pathway genes of pVS6, *coaA* and  $adhE^{A267T/E568K}$ ), in the absence or presence of additional 25 μM pantothenate, in SMD medium. Error bars represent the standard deviation of three independent replicates.

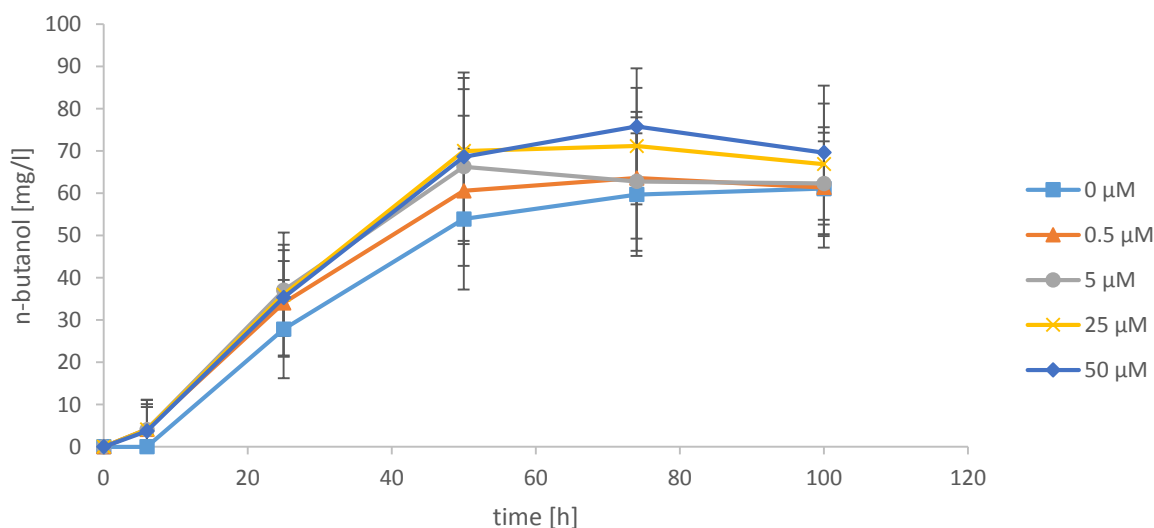

**Fig. S8: n-Butanol production with n-butanol pathway (pVS6) and *coaA* overexpression (pVS5\_4) in VSY0 ( $\Delta adh1-5$ ) with addition of pantothenate.** Five different concentrations of pantothenate were added to SMD medium: 0 μM (square), 0.5 μM (triangle), 5 μM (circle), 25 μM (cross), 50 μM (diamond). Error bars represent the standard deviation of three independent replicates.

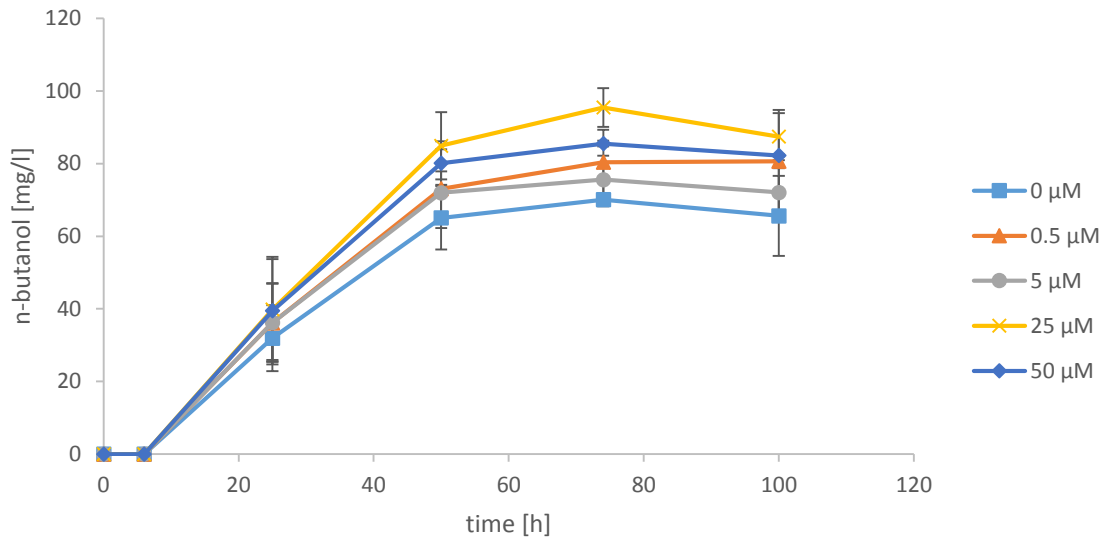

**Fig. S9: n-Butanol production with n-butanol pathway (pVS6) and *coaA* overexpression (pVS5\_4) in VSY8 ( $\Delta adh1-5 sfa1$ , integrated  $adhE^{A267T/E568K}$ ) with addition of pantothenate.** Five different concentrations of pantothenate were added to SMD medium: 0  $\mu\text{M}$  (square), 0.5  $\mu\text{M}$  (triangle), 5  $\mu\text{M}$  (circle), 25  $\mu\text{M}$  (cross), 50  $\mu\text{M}$  (diamond). Error bars represent the standard deviation of three independent replicates.

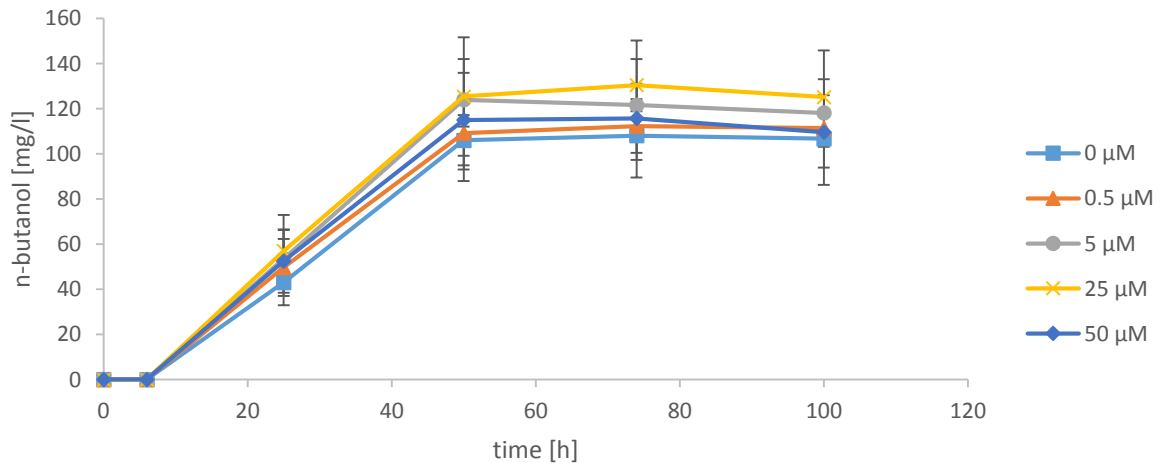

**Fig. S10: n-Butanol production of strain VSY10 ( $\Delta adh1-5 sfa1 adh6 gpd2$  with integrated  $adhE^{A267T/E568K}$ , *coaA* and n-butanol pathway) with addition of pantothenate.** Five different concentrations of pantothenate were added to SMD medium: 0  $\mu\text{M}$  (square), 0.5  $\mu\text{M}$  (triangle), 5  $\mu\text{M}$  (circle), 25  $\mu\text{M}$  (cross), 50  $\mu\text{M}$  (diamond). Error bars represent the standard deviation of three independent replicates.
