# Supplementary material for: n-Butanol production in Saccharomyces cerevisiae is limited by the availability of coenzyme A and cytosolic acetyl-CoA
Source: Springer Nature journal article supplement (doi:10.1186/s13068-016-0456-7), 2016-02-24
Supplement: MOESM2 [file 13068_2016_456_MOESM2_ESM.pdf]

**Table S1: Yeast promoters and terminators used for the expression of n-butanol pathway genes in this study.** DNA sequences were amplified from chromosomal DNA of CEN.PK2-1C. When not otherwise indicated, promoters were taken from 1-500 bp before and terminators 1-300 bp behind the respective open reading frames.

| promoter         | gene                                                                                | terminator |
|------------------|-------------------------------------------------------------------------------------|------------|
| pHXT7*           | <sup>Sc</sup> <i>ERG10</i> , <sup>Ca</sup> <i>thlA</i> , <sup>Ss</sup> <i>nphT7</i> | tVMA16     |
| pPGK1            | <sup>Ca</sup> <i>hbd</i>                                                            | tEFM1      |
| pTPI1            | <sup>Ca</sup> <i>crt</i>                                                            | tYHI9      |
| pPYK1            | <sup>Eg</sup> <i>ter</i> , <sup>Td</sup> <i>ter</i> , <sup>Sc</sup> <i>ccr</i>      | tIDP1      |
| pADH1**          | <sup>Ca</sup> <i>adhE2</i> , <sup>Ca</sup> <i>bdhB</i>                              | tRPL3      |
| pTDH3            | <sup>Ec</sup> <i>eutE</i>                                                           | tRPL41B    |
| pPFK1            | <sup>Ec</sup> <i>adhE</i> A267T/E568K                                               | tDIT1      |
| pFBA1, pMET25    | <sup>Sc</sup> <i>FEN2</i>                                                           | tPRC1      |
| pPMA1***, pMET25 | <sup>Ec</sup> <i>coaA</i>                                                           | tVMA2      |
| pGPM1****        | <sup>Sc</sup> <i>CAB2</i>                                                           | tNAT5      |

\* (-1 to -389 bp; [1])

\*\* (-1 to -800 bp; [2])

\*\*\* (-1 to -575 bp, -700 to -925 bp; [3])

\*\*\*\* (-1 to -395 bp; [4])

**Table S2: Genes used in this study and their corresponding identifiers.**

Genes from *Saccharomyces cerevisiae* (Sc), *Clostridium acetobutylicum* (Ca), *E. coli* (Ec), *Euglena gracilis* (Eg), *Streptomyces collinus* (Sco), *Streptomyces sp.* CL190 (Ss), *Treponema denticola* (Td) are indicated by prefixes in superscript.

| gene                       | identifier |
|----------------------------|------------|
| <sup>Sc</sup> <i>ERG10</i> | YPL028W    |
| <sup>Ca</sup> <i>hbd</i>   | CA_C2708   |
| <sup>Ca</sup> <i>crt</i>   | CA_C2712   |
| <sup>Eg</sup> <i>ter</i>   | Q5EY90     |
| <sup>Td</sup> <i>ter</i>   | TDE_0597   |
| <sup>Ca</sup> <i>adhE2</i> | CA_P0035   |
| <sup>Ec</sup> <i>eutE</i>  | G7285      |
| <sup>Ca</sup> <i>thlA</i>  | CA_C2873   |
| <sup>Ca</sup> <i>bdhB</i>  | CA_C3298   |
| <sup>Ss</sup> <i>nphT7</i> | D7URV0     |
| <sup>Sco</sup> <i>ccr</i>  | AAA92890.1 |
| <sup>Ec</sup> <i>adhE</i>  | EG10031    |
| <sup>Sc</sup> <i>FEN2</i>  | YCR028C    |
| <sup>Ec</sup> <i>coaA</i>  | EG10922    |
| <sup>Sc</sup> <i>CAB2</i>  | YIL083C    |

**Table S3: Relevant primers for this study**

The abbreviations within the primer names were used as follows: forward primer (fw), reverse primer (rev), overlap (ov).

| Primer name                    | Sequence 5'-3'                                                   | Description       |
|--------------------------------|------------------------------------------------------------------|-------------------|
| vsp70_2μ_ovInt3'GPD2_fw        | TGACGGCTCTCCAGTCAGGCGCCGTCGACACGCATTT<br>AAGCATAAACACG           | construction pVS1 |
| vsp71_2μ_ovAmp_rev             | CCCCGAAAAGTGCCACCTGAGGCCTGTCGACAACGA<br>AGCATCTGTGCTTC           | construction pVS1 |
| vsp72_AmpColE1_ov2μ_fw         | GAAGCACAGATGCTTCTGTTGTCGACAGGCCTCAGGT<br>GGCACTTTTCGGGG          | construction pVS1 |
| vsp73_AmpColE1_ovInt5'GPD2_rev | GGTAATTCCTTGCTCCAGTTTTCTGCAGGAGGCCTC<br>GCGTTGCTGGCGTTTTTCC      | construction pVS1 |
| vsp74_Int5'GPD2_ovAmpColE1_fw  | ACGCCAGCAACGCGAGGCCTCCTGCAGGAAAAGTGG<br>AGCAAGGAATTACC           | construction pVS1 |
| vsp75_Int5'GPD2_ovtVMA16_rev   | AAAATTAACAGCCCTCAATATGCTAGCCCTGCAGGA<br>AAAAAACTAGAAAAAAGTAACAAG | construction pVS1 |
| vsp76_tVMA16_ovInt5'GPD2_fw    | TTCTAGTTTTTTCTGCAGGGCTAGCATATTGAGGG<br>CGTAGTAATTTAAAGAAGAAC     | construction pVS1 |
| vsp77_tVMA16_ovERG10_rev       | CCTCTATTGTCATTGAAAAGATTTAAGCGCTCAAACC<br>AGGCTTTTC               | construction pVS1 |
| vsp78_ERG10_ovtVMA16_fw        | AAAAGAAAAGCCTGGTTTGAGCGCTTAAATCTTTTCA<br>ATGACAATAGAGG           | construction pVS1 |
| vsp79_ERG10_ovpHXT7_rev        | CAAAAAGTTTTTTAATTTAATCAAAAATGTCTCAA<br>AACGTTTACATTG             | construction pVS1 |
| vsp80_pHXT7_ovERG10_fw         | AATGTAACGTTTTGAGACATTTTTGATTAATAA<br>AAAAACTTTTTG                | construction pVS1 |
| vsp81_pHXT7_ovpPGK1_rev        | GTTTTGTTCTTTTGCAAACCCGGGGCTAGCCGTA<br>GGAACAATTCGGGC             | construction pVS1 |
| vsp82_pPGK1_ovpHXT7_fw         | CCGAAATTGTTCTACGGCTAGCCCCGGGTGTTTGA<br>AAAAGAACAAAAC             | construction pVS1 |
| vsp83_pPGK1_ovHbd_rev          | CCAATAACACAAACCTTCTCATTGTTTTATTTGTTG<br>TAAAAAGTAG               | construction pVS1 |
| vsp84_Hbd_ovpPGK1_fw           | TCTACTTTTTACAACAAATATAAAAACATGAAGAAGG<br>TTTGTGTTATTGG           | construction pVS1 |
| vsp85_Hbd_ovtEFM1_rev          | GAATTTTATACTTAGGCTACAGATCAAAGTTACTTAG<br>AGTAATCGTAGAAACCC       | construction pVS1 |
| vsp86_tEFM1_ovHbd_fw           | TTCTACGATTACTCTAAGTAACTTTGATCTGTAGCCTA<br>AGTATAAAATTC           | construction pVS1 |
| vsp87_tEFM1_ovYHI9_rev         | GAACTTTTCGATACAAAAGCGCCGCCCGGGTACT<br>GAAATTCATGACACAATAACG      | construction pVS1 |
| vsp88_tYHI9_ovEFM1_fw          | TGTCATGAATTTAGTACCCGGGGCGGCCGTTTTTG<br>TATCGAAAAGTTCATCAG        | construction pVS1 |
| vsp89_tYHI9_ovCrt_rev          | GATTGAAGGTTTCAAGAACAGATAAGATTCTAACGC<br>ATAGTTGTAAGG             | construction pVS1 |
| vsp90_Crt_ovtYHI9_fw           | ACCTTACAACATATGCGTTTGAATCTTATCTGTTCTTG<br>AAACCTCAATC            | construction pVS1 |
| vsp91_Crt_ovpTPI1_rev          | CTACAAAAACACATACATAAACTAAAAATGGAATTG<br>AACAACGTCATC             | construction pVS1 |
| vsp92_pTPI1_ovCrt_fw           | AGATGACGTTGTTCAATTCATTTTTAGTTTATGTATG<br>TGTTTTTTGTAG            | construction pVS1 |
| vsp93_pTPI1_ovloxP_rev         | TTATATTAAGGGTTGTCGCTAGGGCGGCCGATTTA<br>AACTGTGAGGACCTTAATAC      | construction pVS1 |
| vsp94_loxP_ovpTPI1_fw          | GGTCTCACAGTTTAAATGCGGCCGCCCTAGGCGACA<br>ACCCTTAATATAACTTCG       | construction pVS1 |
| vsp95_loxP_ovpPYK1_rev         | AAAATCTCCAATCTGTGGCGGCCCTAGGGATCTG<br>ATATCACCTAATAACTTCG        | construction pVS1 |
| vsp96_pPYK1_ovloxP_fw          | TATTAGGTGATATCAGATCCCTAGGGGCGGCCACA<br>GATTGGGAGATTTTCATAGTAGAC  | construction pVS1 |
| vsp97_pPYK1_ovegTer_rev        | GGTGGTGGTGAACATAGCCATTGTGATGATGTTTTAT<br>TTGTTTTGATTG            | construction pVS1 |
| vsp98_egTer_ovpPYK1_fw         | CCAATCAAAACAAATAAAACATCATCAATGGCTAT<br>GTTCCACCACCACC            | construction pVS1 |

|                              |                                                                 |                       |
|------------------------------|-----------------------------------------------------------------|-----------------------|
| vsp99_egTer_ovtIDP1_rev      | GTAGATTGGGCTACGTAAATTCGATTATTGTTGAGCA<br>GCAGATGGC              | construction pVS1     |
| vsp100_tIDP1_ovegTer_fw      | ACTTGCCATCTGCTGCTCAACAATAATCGAATTTACGT<br>AGCCCAATCTAC          | construction pVS1     |
| vsp101_tIDP1_ovtRPL3_rev     | CAATCTTTGCTACAATGCCGGCGGCGGCCAACTTTT<br>GGACGAATTAGAACAGC       | construction pVS1     |
| vsp102_tRPL3_ovtIDP1_fw      | TTCTAATTCGTCCAAAAGTTGGCGCGCCGCCGCATT<br>GTAGCAAAGATTGTAAGG      | construction pVS1     |
| vsp103tRPL3_ovAdhE2_rev      | GAAGGATATCTACATTAAGTCTTTCTAAGAAGTTTTGT<br>TAGAAAATAAATC         | construction pVS1     |
| vsp104_AdhE2_ovtRPL3_fw      | ATTTATTTTCTAACAAAACCTTCTAGAAAGACTTAATG<br>TAGATATCCTTC          | construction pVS1     |
| vsp105_AdhE2_ovpADH1_rev     | GCATACAATCAACTATCTCATATACAATGAAGGTAC<br>CAACCAAAAG              | construction pVS1     |
| vsp106_pADH1_ovAdhE2_fw      | TTCCTTTTGGTTGGTAACCTTCATTGTATATGAGATAG<br>TTGATTGTATGC          | construction pVS1     |
| vsp107_pADH1_ovInt3'GPD2_rev | GAGGGGGGGGGAGAGTGTGGCGCCCGGCAAGTC<br>CAATGCTAGTAGAGAAGG         | construction pVS1     |
| vsp108_Int3'GPD2_ovpADH1_fw  | TCTCTACTAGCATTGGACTTGCCGGCGGCCACACT<br>CTCCCCCCCCCTC            | construction pVS1     |
| vsp109_Int3'GPD2_ov2μ_rev    | CGTGTTTATGCTTAAATGCGTGTGACGGCGCCTGAC<br>TGGAGAGCCGTCAGTAGTG     | construction pVS1     |
| vsp136_Int3'SFA1_ovpPFK1_fw  | CTCATCCTTATATTTTCACTAGTGGCGCCGAGTACTT<br>AATTAACCTAAGTAAGCATG   | construction pVS4     |
| vsp137_Int5'SFA1_ovloxP_rev  | GTTATATTAAGGGTTGTCGCCTAGGCCTGCAGGAATT<br>CCATTATTACGTAACCTTACAG | construction pVS4     |
| vsp138_loxP_ovInt5'SFA1_fw   | TACGTAATAATGGAATTCCTGCAGGCCTAGGCGACAA<br>CCCTTAATATAACTTCG      | construction pVS4     |
| vsp143_pPFK1_ovInt3'SFA1_rev | CTTAGTTTAAATTAAGTACTCGGCCACTAGTGAAAA<br>ATATAAGGATGAGAAAGTG     | construction pVS4     |
| vsp144_pPFK1_ovadhE_fw       | TCAATTCAGCGACGTTAGTAACAGCCATCTTTGATAT<br>GATTTTGTTCAG           | construction pVS4     |
| vsp145_tDIT1_ovadhE_rev      | AGAAGGCTAAGAAGTCCGCTTAATAAAGTAAGAGCG<br>CTACATTGG               | construction pVS4     |
| vsp146_adhE_ovtDIT1_fw       | GTAGACCAATGTAGCGCTCTTACTTTATTAAGCGGAC<br>TTCTTAGCCTTC           | construction pVS4     |
| vsp147_adhE_ovpPFK1_rev      | CTGAAACAAAATCATATCAAAGATGGCTGTTACTAAC<br>GTCGCTG                | construction pVS4     |
| vsp150_Leu_fw                | AGGTTCCCTGGGTTTGTGCC                                            | verification of Δadh2 |
| vsp151_Leu_rev               | GGCAAAACGACGATCTTCTTAGGG                                        | verification of Δadh2 |
| vsp154_seq1_2μ               | GGTAAAATAGCGCTTTCGCG                                            | sequencing pVS1       |
| vsp155_seq2_ColE1            | AGGGAGCTTCCAGGGGG                                               | sequencing pVS1       |
| vsp156_seq3_tVMA16           | CATACACATGTATCTCAGATATCTC                                       | sequencing pVS1       |
| vsp157_seq4_ERG10            | TTTCGTTGTGCAACTTACC                                             | sequencing pVS1       |
| vsp158_seq5_pHXT7            | CTTAGAAAAGACAAGTTGAGC                                           | sequencing pVS1       |
| vsp159_seq6_pPGK1            | CGTGTGACAACAACAGCC                                              | sequencing pVS1       |
| vsp160_seq7_hbd              | TATTGCTATTGGTAAGGATCC                                           | sequencing pVS1       |
| vsp161_seq8_tYHI9            | CTCAACTTCTTCTCGCC                                               | sequencing pVS1       |
| vsp162_seq9_crt              | CACCGAAACCTGGGG                                                 | sequencing pVS1       |
| vsp163_seq10_pTPI1           | TTACAGCAGCCGAGCC                                                | sequencing pVS1       |
| vsp164_seq11_kanMX           | GGATTTGCCACTGAGG                                                | sequencing pVS1       |
| vsp165_seq12_kanMX           | TCGACATCATCTGCC                                                 | sequencing pVS1       |
| vsp166_seq13_pPYK1           | CAGTTATATCATGGTCCCC                                             | sequencing pVS1       |
| vsp167_seq14_egTer           | GGTGTCTTGACACAAGGC                                              | sequencing pVS1       |
| vsp168_seq15_egTer           | TCTCCGACTTCGCTGG                                                | sequencing pVS1       |
| vsp169_seq16_tRPL3           | TCCATTTTGGACTTGGG                                               | sequencing pVS1       |
| vsp170_seq17_adhE2           | TGTTAGAAGCGTGAGCC                                               | sequencing pVS1       |
| vsp171_seq18_adhE2           | GGTAATCTTGTTAACGTAACCC                                          | sequencing pVS1       |
| vsp172_seq19_adhE2           | TGTCAGCGTTAATAGCACC                                             | sequencing pVS1       |

|                                 |                                                                          |                                                               |
|---------------------------------|--------------------------------------------------------------------------|---------------------------------------------------------------|
| vsp173_seq20_adhE2              | CGTCGTGGTCAATAATACC                                                      | sequencing pVS1                                               |
| vsp174_seq21_pADH1              | ATTTTTTGTCAATGCGG                                                        | sequencing pVS1                                               |
| vsp175_seq22_Int3'GPD2          | TCTTTTTCCCCAACC                                                          | sequencing pVS1                                               |
| vsp181_seq28_hphNT1             | AGAGATCTGTTTAGCTTGCC                                                     | sequencing pVS4                                               |
| vsp182_seq29_hphNT1             | GTCACGCTTACATTCACG                                                       | sequencing pVS4                                               |
| vsp185_seq32_pPFK1              | TGTTGATGACGACAATGG                                                       | sequencing pVS4                                               |
| vsp189_kanMX_ovtADH4_rev        | ATAAGGCACACGCATAATTGACGTTTATGAGTTCGTT<br>CGATTTTTTCACTAGTGGATCTGATATCACC | Δadh4 kanMX-deletion<br>cassette construction                 |
| vsp190_kanMX_ovpADH4_fw         | TAGTTTTTATGTTGCGCATCAGAGGTACGTGTTAAT<br>ATGTCAGACGCTGCAGGTCGAC           | Δadh4 kanMX-deletion<br>cassette construction                 |
| vsp191_LEU2_ovtADH2_rev         | ACTTGATAATGAAAATAAATCGTAAAGACATAAG<br>AGATCCGCAATCCTCCAATATCAAATTAGG     | Δadh2 LEU2- deletion<br>cassette construction                 |
| vsp192_LEU2_ovpADH2_fw          | AAGCATACAATCAACTATCAACTATTAATATATCGTA<br>ATACACAAATCAATTGCTCTGACTTCC     | Δadh2 LEU2- deletion<br>cassette construction                 |
| vsp193_tADH4_rev                | CAAACGTACCGGTCTCGGC                                                      | verification Δadh4 and<br>fusion-PCR for deletion<br>cassette |
| vsp194_pADH4_fw                 | TGTGTTTCAAGGATCCCCGG                                                     | verification Δadh4 and<br>fusion-PCR for deletion<br>cassette |
| vsp195_tADH2_rev                | GGGTACAACCTCACAGGCGAGGG                                                  | verification Δadh2 and<br>fusion-PCR for deletion<br>cassette |
| vsp196_pADH2_fw                 | GGCAGAGGAGAGCATAGAAATGGGG                                                | verification Δadh2 and<br>fusion-PCR for deletion<br>cassette |
| vsp197_Int3'SFA1_ov2μ_rev       | CGTGTTTATGCTTAAATGCGTGCCGGCGGCGCTGGA<br>ATTTATGTCACCACC                  | construction pVS4                                             |
| vsp198_2μ_ovInt3'SFA1_fw        | TGGTGACATAAATCCAGGCGCCGCCGACGCATTT<br>AAGCATAAACACG                      | construction pVS4                                             |
| vsp199_2μ_ovAmp_rev             | CCCCGAAAAGTGCCACTGGGCGCGCCGCCGCAAC<br>GAAGCATCTGTGCTTC                   | construction pVS4                                             |
| vsp200_AmpColE1_ov2μ_fw         | GAAGCACAGATGCTTCGTTGCCGGCGGCGCCAG<br>GTGGCACTTTTGGGG                     | construction pVS4                                             |
| vsp201_AmpColE1_ovInt5'SFA1_rev | TTAGGAATATATGAGTGTACCTGCAGGGGCGCGC<br>CCGCGTTGCTGGCGTTTTTCC              | construction pVS4                                             |
| vsp202_Int5'SFA1_ovAmpColE1_fw  | AACGCCAGCAACGCGGGCGCCCTGCAGGTACAC<br>TCATATATATTCCTAATTTCC               | construction pVS4                                             |
| vsp205_seq38_adhE               | TCTTAGCAGCAGTTTACC                                                       | sequencing pVS4                                               |
| vsp206_seq39_adhE               | CGTGAGTAACAGCGTCC                                                        | sequencing pVS4                                               |
| vsp207_seq40_adhE               | AGATGGAGTTACCACCC                                                        | sequencing pVS4                                               |
| vsp208_seq41_adhE               | GATAGCTGGCTTACCGG                                                        | sequencing pVS4                                               |
| vsp209_seq42_pPFK1              | AGCTTTCCAAATAGTGC                                                        | sequencing pVS4                                               |
| vsp210_tADH4_ovkanMX_fw         | ATATCAGATCCACTAGTAAAAAATCGAACGAECTA<br>TAAACGTC                          | fusion-PCR for Δadh4<br>deletion cassette                     |
| vsp211_pADH4_ovkanMX_rev        | GTCGACCTGCAGCGTCTGACATATTAACACGTACCT<br>CGTGATGC                         | fusion-PCR for Δadh4<br>deletion cassette                     |
| vsp212_pADH4_fw                 | AGCTGTTATGCGCACTACTTGAAAGG                                               | verification Δadh4                                            |
| vsp213_tADH4_rev                | GCATCCAACCTGAAACCCACC                                                    | verification Δadh4                                            |
| vsp214_ADH1_fw                  | CTTCTACGAATCCCACGG                                                       | test-PCR within ADH1                                          |
| vsp215_ADH1_rev                 | GACCAAACCTCTGGCG                                                         | test-PCR within ADH1                                          |
| vsp216_ADH3_fw                  | CCACAGCTGCAATCCC                                                         | test-PCR within ADH3                                          |
| vsp217_ADH3_rev                 | GTGATTTGATCAAACCTCTGC                                                    | test-PCR within ADH3                                          |
| vsp218_ADH5_fw                  | AGTTCCGGAACCTAAGCC                                                       | test-PCR within ADH5                                          |
| vsp219_ADH5_rev                 | GATTTGATCAAACCTCTGGC                                                     | test-PCR within ADH5                                          |
| vsp220_ADH4_fw                  | CAGCTATTGGTCTCTCCGG                                                      | test-PCR within ADH4                                          |
| vsp221_ADH4_rev                 | TCACCTAATCTCTTCTGGCC                                                     | test-PCR within ADH4                                          |
| vsp222_ADH2_fw                  | GGCATGGTGACTIONGGCC                                                      | test-PCR within ADH2                                          |
| vsp223_ADH2_rev                 | TGGTATCAGCTCTGTTCCCC                                                     | test-PCR within ADH2                                          |

|                                 |                                                                  |                                                   |
|---------------------------------|------------------------------------------------------------------|---------------------------------------------------|
| vsp235_pADH2_ovLeu2_rev         | GTATTACGATATAGTTAATAGTTGATAGTTGATTGTAT<br>GCTTTTTGTAGC           | fusion-PCR for $\Delta$ adh2<br>deletion cassette |
| vsp236_tADH2_ovLeu2_fw          | GGATCTCTTATGTCTTTACGATTATAGTTTTATTATC<br>AAGTATGC                | fusion-PCR for $\Delta$ adh2<br>deletion cassette |
| vsp237_tADH2_rev                | GAGGGAGACGATTTCAGAGGAGC                                          | verification $\Delta$ adh2                        |
| vsp238_pADH2_fw                 | GGAACACCGGGCATCTCC                                               | verification $\Delta$ adh2                        |
| vsp239_2 $\mu$ _ovAmp_rev       | CCGAAAAGTGCCACCTGAGGCCTGGCGGCCAACGA<br>AGCATCTGTGCTTC            | construction pVS5                                 |
| vsp240_2 $\mu$ _ovInt3'ADH6_fw  | TAGCGGATGAGGATGTTCCACTAGTGGCGGCCACG<br>CATTAAAGCATAAACACG        | construction pVS5                                 |
| vsp241_AmpColE1_ovInt5'ADH6_rev | TTTATTATCTATTATATACCTGCAGGAGGCCTCGC<br>GTTGCTGGCGTTTTTCC         | construction pVS5                                 |
| vsp242_AmpColE1_ov2 $\mu$ _fw   | AGCACAGATGCTTCGTTGGCGGCCAGGCCTCAGGT<br>GGCACTTTTCGGGG            | construction pVS5                                 |
| vsp243_Int5'ADH6_ovtPRC1_rev    | TACCGAGTTTGTAAGTACAATGTTTAAACCTGCAGG<br>CTTCACTTTTCTTTTTCTCC     | construction pVS5                                 |
| vsp244_Int5'ADH6_ovAmp_fw       | AACGCCAGCAACGCGAGGCCTCTGCAGGTGATATA<br>TAATAGATAATAAATCCAGG      | construction pVS5                                 |
| vsp245_tPRC1_ovFEN2_rev         | GGCTGAAATTTCAACCCATTTCAGATAAAGCGTGTAT<br>GTGTAGGCATACC           | construction pVS5                                 |
| vsp246_tPRC1_ovInt5'ADH6_fw     | AGAAAAGTGAAGCCTGCAGGGTTTAAACATTGTAC<br>TTACAAACTCGGTAGTTGG       | construction pVS5                                 |
| vsp247_FEN2_ov_pFBA1_rev        | CCATAACCAAGTAATACATATTCAAATGATGAAGGA<br>ATCTAAGTCTATCACTC        | construction pVS5                                 |
| vsp248_FEN2_ov_tPRC1_fw         | ACGGTATGCCTACACATACACGCTTTATCTGAATGGG<br>TTAGAAATTTTCAG          | construction pVS5                                 |
| vsp249_pFBA1_ovloxP_rev         | TTATATTAAGGGTTGTCGCTAGGGTTTAACTGGGT<br>CATTACGTAATAATGATAGG      | construction pVS5                                 |
| vsp250_pFBA1_ovFEN2_fw          | GATAGACTTAGATTCCTTCATCATTTTGAATATGTATT<br>ACTTGGTTATGG           | construction pVS5                                 |
| vsp251_loxP_ovpPMA1_rev         | GCCTGTTTATGTTTCTCCGTTGCGGCCCCCTAGGGA<br>TCTGATATCACCTAATAACTTCG  | construction pVS5                                 |
| vsp252_loxP_ovpFBA1_fw          | TATTTACGTAATGACCCAGTTTAAACCTAGGCGACA<br>ACCCTTAATATAACTTCG       | construction pVS5                                 |
| vsp253_pPMA1_ovcoaA_rev         | GGTTTGTCCTTAATAGACATATTGATATTGTTGATA<br>ATTAATCTTTC              | construction pVS5                                 |
| vsp254_pPMA1_ovloxP_fw          | AGGTGATATCAGATCCCTAGGGCGCCGCAACGGAG<br>AAACATAAACAGGC            | construction pVS5                                 |
| vsp255_coaA_ovtVMA2_rev         | AAAAGCCTTTTTCTCAGCAACCGTCTTACTTTCTC<br>AATCTGACTTC               | construction pVS5                                 |
| vsp256_coaA_ovpPMA1_fw          | GAAAGATTTAATTATCAAACAATATCAATATGTCTATT<br>AAGGAACAAACC           | construction pVS5                                 |
| vsp257_tVMA2_ovtNAT5_rev        | AATCACGAACCTTTCATATTCAGGATCCGCGGCCGCGC<br>TGATGTTCTTCGAGACCGGG   | construction pVS5                                 |
| vsp258_tVMA2_ovcoaA_fw          | GAAGTCAGATTGAGAAAAGTAAGAGGACGGTTGCTGA<br>AGAAAAAGGC              | construction pVS5                                 |
| vsp259_tNAT5_ovCAB2_rev         | ACTAAGTTGGCTACCAAGTAACAGATGGCTGAAAAA<br>TTTTTTTTTTTTTTTGG        | construction pVS5                                 |
| vsp260_tNAT5_ovtVMA2_fw         | TCGAAGAACATCAGCGCGGCCGCGGATCCTGAATAT<br>GAAAGTTCGTGATTCTCTGC     | construction pVS5                                 |
| vsp261_CAB2_ovpGPM1_rev         | CCAAACAACACACATATTACAATAATGCCACCATTG<br>CCAG                     | construction pVS5                                 |
| vsp262_CAB2_ovtNAT5_fw          | AAAAAAAAAAAAAAAAATTTTTCAGCCATCTGTTACTTGG<br>TAGCCAACCTAGTCTTAGAG | construction pVS5                                 |
| vsp263_pGPM1_ovInt3'ADH6_rev    | TACATTTATCAAGAGCTTGACAACACTAGTGGATCCC<br>ACCCACACACAAGCTTC       | construction pVS5                                 |
| vsp264_pGPM1_ovCAB2_fw          | TGTTCAAACCTGGCAATGGTGGCATTATTGTAATATG<br>TGTGTTTGTGGG            | construction pVS5                                 |
| vsp265_Int3'ADH6_ov2 $\mu$ _rev | TTTATGCTTAAATGCGTGGCGGCCACTAGTGGAAACA<br>TCCTCATCCGC             | construction pVS5                                 |
| vsp266_Int3'ADH6_ovpGPM1_fw     | CTTGTGTGTGGGTGGGATCCACTAGTGTGTCAAGCT<br>CTTGATAAATGTAGC          | construction pVS5                                 |

|                                |                                                                          |                                                 |
|--------------------------------|--------------------------------------------------------------------------|-------------------------------------------------|
| vsp269_pGPD2_fw                | GGAACATCCGAGCACCCGCGCC                                                   | verification<br>chromosomal<br>integration pVS6 |
| vsp270_tGPD2_rev               | GGCGGCATCGAAATCTTCTTCTTGCCC                                              | verification<br>chromosomal<br>integration pVS6 |
| vsp271_seq43_tPRC1             | GCAAATTGTAGAAGCAGCTC                                                     | sequencing pVS5                                 |
| vsp272_seq44_FEN2              | TCTTTCTTGCAAATCAGCG                                                      | sequencing pVS5                                 |
| vsp273_seq45_FEN2              | GAACAACCATCTCCAACC                                                       | sequencing pVS5                                 |
| vsp274_seq46_FEN2              | TGATAGACTTAGATTCCTTCATC                                                  | sequencing pVS5                                 |
| vsp275_seq47_tADH1             | ATGAGTTGATGAATCTCGG                                                      | sequencing pVS5                                 |
| vsp276_seq48_pPMA1             | TTCAAATGTCCTATCATTATCGTC                                                 | sequencing pVS5                                 |
| vsp277_seq49_coaA              | TGGTAAGTCTACCACCGC                                                       | sequencing pVS5                                 |
| vsp278_seq50_coaA              | GAGCTTCTTGATCTTGACC                                                      | sequencing pVS5                                 |
| vsp279_seq51_tNAT5             | GCTCTTAGACGTATATATTCATC                                                  | sequencing pVS5                                 |
| vsp280_seq52_CAB2              | CAAGTATTGGTTGACGGTGG                                                     | sequencing pVS5                                 |
| vsp281_seq53_pGPM1             | ACAAAAAAAAATTACAAAGGAAGG                                                 | sequencing pVS5                                 |
| vsp282_seq54_Int3'ADH6         | ACGTTCATAGGGTATCGG                                                       | sequencing pVS5                                 |
| vsp283_loxP_ovMet25_rev        | AGGGATTGCAACCTTGCATCGCGCCGCCCTAGGG<br>ATCTGATATCACCTAATAACTTCG           | construction coaA with<br>pMet25                |
| vsp284_Met25_ovloxP_fw         | TTAGGTGATATCAGATCCCTAGGGCGCCGCGATGC<br>AAGGGTTCGAATCC                    | construction coaA with<br>pMet25                |
| vsp285_Met25_ovcoaA_rev        | TCATCAAGGTTTGTCTTAATAGACATTCTAGAGTAT<br>GGATGGGGGTAATAG                  | construction coaA with<br>pMet25                |
| vsp286_coaA_ovMet25_fw         | AATTCTATTACCCCATCCATACTCTAGAATGTCTATT<br>AAGGAACAAACC                    | construction coaA with<br>pMet25                |
| vsp287_tVMA2_ovtNAT5_rev       | ATTTATCAAGAGCTTGACAACACTAGTGCGGCCGCGC<br>TGATGTTCTTCGAGACCGGG            | construction pVS5-<br>variants                  |
| vsp288_Int3'ADH6_ovtVMA2_fw    | TCGAAGAACATCAGCGCGCCGCGACTAGTGTGTCA<br>AGCTCTTGATAAATGTAGC               | construction pVS5-<br>variants                  |
| vsp289_pFBA1_ovpRS62N_rev      | AAAACGCCAGCAACGCGCCTTTTACGTTTCGCGCA<br>ATTGTGGGTCAATACGTAATAATGATAGG     | construction pVS5-<br>variants                  |
| vsp290_tPRC1_ovpRS62N_fw       | GGTGTGAAATACCGCACAGATGCGTAAGGAGAAAAT<br>ACCGCATATTGTACTTACAACTCGGTAGTTGG | construction pVS5-<br>variants                  |
| vsp291_tVMA2_ovpRS62N_rev      | GGAAAAACGCCAGCAACGCGCCTTTTACGTTTCG<br>GCGAATTGGCTGATGTTCTTCGAGACCGGG     | construction pVS5-<br>variants                  |
| vsp292_Met25_ovpRS62N_fw       | GGTGTGAAATACCGCACAGATGCGTAAGGAGAAAAT<br>ACCGCATGATGCAAGGGTTCGAATCC       | construction pVS5-<br>variants                  |
| vsp293_pPYK1_ovtdTer_rev       | GTTGTTTCTAACCATTTGGCTTAAACAATCATTGTGATGA<br>TGTTTTATTTGTTTTGATTG         | construction pVS6/7/8<br>(tdTer)                |
| vsp294_tdTer_ovpPYK1_fw        | ACAAATAAAACATCATCACAATGATTGTTAAGCCAAT<br>GGTTAGAAACAAC                   | construction pVS6/7/8<br>(tdTer)                |
| vsp295_tdTer_ovtIDP1_rev       | ATTGGGCTACGTAAATTCGATTAAATTCTGTGCAATCT<br>TTCAACTTCAGC                   | construction pVS6/7/8<br>(tdTer)                |
| vsp296_tIDP1_ovtdTer_fw        | GCTGAAGTTGAAAGATTCGACAGAATTTAATCGAATT<br>TACGTAGCCCAATCTAC               | construction pVS6/7/8<br>(tdTer)                |
| vsp297_pADH1_ovpTDH3_rev       | GCCAGGAATAAACTGTGTTTAAACGCCGCAAGTCC<br>AATGCTAGTAGAGAAGG                 | construction pVS6/7/8<br>(EutE)                 |
| vsp298_pTDH3_ovpADH1_fw        | CTCTACTAGCATTGGACTTGCCGGCGTTAAACACAG<br>TTTATTCCTGGCATCCAC               | construction pVS6/7/8<br>(EutE)                 |
| vsp299_pTDH3_ovEutE_rev        | TTGTTCAATATCTTGTGGTTTCAATTTGTTTGTATGT<br>GTGTTTATTCG                     | construction pVS6/7/8<br>(EutE)                 |
| vsp300_EutE_ovpTDH3_fw         | TCGAATAAACACACATAAACAAACAAAATGAACCAAC<br>AAGATATTGAACAAGTTG              | construction pVS6/7/8<br>(EutE)                 |
| vsp301_EutE_ovtRPL41B_rev      | GAACTTAACGATTTGCTCTCAATCCGCTTAAACAATTC<br>TGAAAGCATCGACC                 | construction pVS6/7/8<br>(EutE)                 |
| vsp302_tRPL41B_ovEutE_fw       | TGGTCGATGCTTTCAGAATTGTTAAGCGGATTGAGA<br>GCAAATCG                         | construction pVS6/7/8<br>(EutE)                 |
| vsp303_tRPL41B_ovInt3'GPD2_rev | AGGGGGGGGAGAGTGTGGCGCGTTTAAACAGGG<br>TAATATAATAAAGCCCTTCG                | construction pVS6/7/8<br>(EutE)                 |

|                               |                                                                       |                                                    |
|-------------------------------|-----------------------------------------------------------------------|----------------------------------------------------|
| vsp304_Int3'GPD2_ovtRPL41B_fw | GAAGGCTTTATTATATTACCTGTTAAACGGCGCC<br>ACACTCTCCCCCCCCTC               | construction pVS6/7/8<br>(EutE)                    |
| vsp305_tRPL3_ovBdhB_rev       | TTGCAAATTTTCAAGAAGTCTGTTAAGAAGTTTTGTT<br>AGAAAATAAATC                 | construction pVS6/7/8<br>(BdhB)                    |
| vsp306_BdhB_ovtRPL3_fw        | AAATGATTTATTTTCTAACAAAACCTTCTAACAGACT<br>TCTTGAAAATTTGC               | construction pVS6/7/8<br>(BdhB)                    |
| vsp307_BdhB_ovpADH1_rev       | CAAGCATACAATCAACTATCTCATATACAATGGTTGA<br>TTTCGAATACTCTATTCC           | construction pVS6/7/8<br>(BdhB)                    |
| vsp308_pADH1_ovBdhB_fw        | GGAATAGAGTATTTCGAAATCAACCATTGTATATGAGA<br>TAGTTGATTGTATGC             | construction pVS6/7/8<br>(BdhB)                    |
| vsp309_tVMA16_ovThIA_rev      | GGTACCGCTATTTTGTGGAAAAGTGTAAAGCGCTCA<br>AACCAGGCTTTTC                 | construction pVS6/7/8<br>(ThIA)                    |
| vsp310_ThIA_ovtVMA2_fw        | AGAAAAGCCTGGTTTGAGCGCTTAACACTTTTCCAAC<br>AAAATAGCGG                   | construction pVS6/7/8<br>(ThIA)                    |
| vsp311_ThIA_ovpHXT7_rev       | CAAAAAGTTTTTTAATTTTAAATCAAAAAATGAAGGA<br>AGTTGTTATTGCTCTGCG           | construction pVS6/7/8<br>(ThIA)                    |
| vsp312_pHXT7_ovThIA_fw        | AGCAATAACAACCTCCTTCAATTTTTGATTAATAA<br>AAAAACTTTTTG                   | construction pVS6/7/8<br>(ThIA)                    |
| vsp313_seq55_tdTer            | CCGTCTTGAAGCCATTCCGG                                                  | sequencing pVS6/7/8                                |
| vsp314_seq56_tdTer            | TTACAGACACGACTTCTTGCC                                                 | sequencing pVS6/7/8                                |
| vsp315_seq57_pTDH3            | CAACTACAGAGAACAGGGGC                                                  | sequencing pVS6/7/8                                |
| vsp316_seq58_eutE             | GGTGACAACGGTTTGACC                                                    | sequencing pVS6/7/8                                |
| vsp317_seq59_eutE             | GCTGAACACCCATTCCGC                                                    | sequencing pVS6/7/8                                |
| vsp318_seq60_BdhB             | TCCAAAGCAATACCACCG                                                    | sequencing pVS6/7/8                                |
| vsp319_seq61_BdhB             | CGTACTTCTCAATTCTTACCC                                                 | sequencing pVS6/7/8                                |
| vsp320_seq62_ThIA             | ATCTTGGGTGTTTCATCGG                                                   | sequencing pVS6/7/8                                |
| vsp321_CEN6ARS4_ovAmp_rev     | GGTTCCGCGCACATTTCCCGAAAAGTGCCACCTGAG<br>GCCTGTCGACGGACGGATCGCTTGCC    | pVS6/7/8 with<br>CEN6ARS4 instead of 2 $\mu$       |
| vsp322_CEN6ARS4_ovGPD2_fw     | CGCTATGTTAGTCACTACTGACGGCTCTCCAGTCAGG<br>CGCCGTCGACGGTCTTTTCATCACGTGC | pVS6/7/8 with<br>CEN6ARS4 instead of 2 $\mu$       |
| vsp323_tACS1_rev              | TTATAATGAGCAAGTCGATACAAGGACTGCC                                       | $\Delta$ acs1 deletion cassette                    |
| vsp324_pACS1_fw               | TCCTCCAGAAAAACAATCTGTTTATTACCG                                        | $\Delta$ acs1 deletion cassette                    |
| vsp325_tACS1_rev              | CGTAAATCCTAGTGCATAAAAAAGGCAG                                          | verification of $\Delta$ acs1<br>deletion cassette |
| vsp326_pACS1_fw               | TAGTGTCGTTTGTGTCAGAGGAACG                                             | verification of $\Delta$ acs1<br>deletion cassette |
| vsp327_tSFA1_rev              | AGTGGGTCGCCGATAATTATAGCGG                                             | verification<br>chromosomal<br>integration of pVS4 |
| vsp328_pSFA1_fw               | GAATAAGTCTGGTTCAGGCAAAACC                                             | verification<br>chromosomal<br>integration of pVS4 |
| vsp339_SFA1_rev               | CACCAGCGGCAGCCACACC                                                   | test-PCR within SFA1                               |
| vsp340_SFA1_fw                | GGGCCACGAAGGAGCCGG                                                    | test-PCR within SFA1                               |
| vsp341_FEN2_ovMet25_rev       | TTACCCCATCCATACTCTAGAATGATGAAGGAATCT<br>AAGTCTATCACTC                 | construction<br>pVS5_5+5_6                         |
| vsp342_Met25_ovFEN2_fw        | TGAGTGATAGACTTAGATTCCTTCATCATTCTAGAGTA<br>TGGATGGGGTAATAG             | construction<br>pVS5_5+5_6                         |
| vsp343_Met25_ovloxP_rev       | TTATATTAAGGGTTGTCGCCTAGGGTTAAACGATGC<br>AAGGGTTCGAATCC                | construction<br>pVS5_5+5_6                         |
| vsp344_loxP_ovMet25_fw        | GGATTTCGAACCTTGCATCGTTTAAACCCTAGGCGAC<br>AACCTTAATATAACTTCG           | construction<br>pVS5_5+5_6                         |
| vsp345_tVMA2_ovInt3'ADH6_rev  | TTATCAAGAGCTTGACAACACTAGTGCGCCGCGCTG<br>ATGTTCTTCGAGACCCGGG           | construction<br>pVS5_5+5_6                         |
| vsp346_Int3'ADH6_ovtVMA2_fw   | GTCTCGAAGAACATCAGCGCGCCGCACTAGTGTGT<br>CAAGCTCTTGATAAATGTAGC          | construction<br>pVS5_5+5_6                         |
| vsp347_tVMA16_ovNphT7_rev     | GCTGCTCTTTTCGCTTTGATCGAATGGTAAGCGCTCA<br>AACCAGGCTTTTC                | construction pVS9                                  |
| vsp348_NphT7_ovtVMA16_fw      | AAAACGGAAAAGAAAAGCCTGGTTTGAGCGCTTACC<br>ATTCGATCAAAGCG                | construction pVS9                                  |

|                                |                                                                        |                                                       |
|--------------------------------|------------------------------------------------------------------------|-------------------------------------------------------|
| vsp349_NphT7_ovpHXT7_rev       | AACAAAAAGTTTTTTAATTTAATCAAAAAATGACCG<br>ACGTCAGATTGACG                 | construction pVS9                                     |
| vsp350_pHXT7_ovNphT7_fw        | TCTGAATCTGACGTCGGTCATTTTTGATTAATAATTA<br>AAAAACTTTTTG                  | construction pVS9                                     |
| vsp351_pPYK1_ovCcr_rev         | TCCAAGATGTCCTTAACGGTCATTGTGATGATGTTTTA<br>TTTGTGTTGATTG                | construction pVS10                                    |
| vsp352_ccr_ovpPYK1_fw          | CAATCAAAACAAATAAACATCATCACAATGACCGTT<br>AAGGACATCTGG                   | construction pVS10                                    |
| vsp353_ccr_ovtIDP1_rev         | TAGATTGGGCTACGTAAATTCGATTAGACGTTTCTGA<br>ATCTGTTGATAGC                 | construction pVS10                                    |
| vsp354_tIDP1_ovCcr_fw          | CGCTATCAACAGATTCAGAAACGTCTAATCGAATTTA<br>CGTAGCCCAATCTAC               | construction pVS10                                    |
| vsp355_seq63_NphT7             | AGTCAGCACCGATGACC                                                      | sequencing pVS9/10                                    |
| vsp356_seq64_ccr               | CAAAGCACTTGACCTGGG                                                     | sequencing pVS9/10                                    |
| vsp357_seq65_ccr               | AGAAACCGGTCAAGCTGC                                                     | sequencing pVS9/10                                    |
| vsp358_loxP_ovInt'5ADH6_fw     | AAAAGAAAAGTGAAAGCCTGCAGGATCCTAGGCGAC<br>AACCCCTTAATATAACTTCG           | construction pVS5_5                                   |
| vsp359_Int'ADH6_ovloxP_rev     | TTATATTAAGGGTTGTCGCCTAGGATCCTGCAGGCTT<br>TCACTTTTCTTTTCTCC             | construction pVS5_5                                   |
| vsp360_CEN6ARS4_ovInt3'SFA1_fw | TGTTGCCATCGATAACGGTGGTGACATAAATTCCAGG<br>CGCCGCCGGCGGTCCTTTTCATCACGTGC | construction pVS4 with<br>CEN6ARS4 instead of 2 $\mu$ |
| vsp361_CEN6ARS4_ovAmpColE1_rev | TTCCGCGCACATTTCCCGAAAAGTGCCACCTGGGCG<br>CGCCGCCGGCGGACGGATCGTTGCC      | construction pVS4 with<br>CEN6ARS4 instead of 2 $\mu$ |
| vsp362_pADH6_fw                | TTTAATTTGTATTGCTCCGGTTTGC GTTGG                                        | verification<br>chromosomal<br>integration pVS5.5     |
| vsp363_tADH6_rev               | ACAACAAAGGCTTCTCCATCAACTTCCCC                                          | verification<br>chromosomal<br>integration pVS5.5     |
| vsp364_ADH6_fw                 | GACATTAAGATCGAAGCATGTGGTGTCTGCGG                                       | test-PCR within ADH6                                  |
| vsp365_ADH6_rev                | CCTTTCGAAGGCTTCATGGACGCCGG                                             | test-PCR within ADH6                                  |

**Table S4: Statistical analysis of n-butanol production**

A t-test was performed (unpaired, two-tailed, confidence: 95%) with program GraphPad Prism 5. The titers of figure 5 and the yields of figure S4 were compared (strain 1 with strain 2).

| Strain 1            | Strain 2                                      | p-value of titer | p-value of yield |
|---------------------|-----------------------------------------------|------------------|------------------|
| WT + pVS6           | WT + pVS6 + pVS5_4                            | 0.0479           | 0.1518           |
| WT + pVS6 + pVS5_4  | WT + pVS6 + pVS5_4 + 25 $\mu$ M pantothenate  | 0.0004           | 0.0012           |
| VSY0 + pVS6         | VSY0 + pVS6+ pVS5_4                           | 0.0008           | 0.0004           |
| VSY0 + pVS6+ pVS5_4 | VSY0 + pVS6+ pVS5_4 + 25 $\mu$ M pantothenate | 0.0731           | 0.0085           |
| VSY8 + pVS6         | VSY8 + pVS6+pVS5_4                            | 0.0002           | <0.0001          |
| VSY8 + pVS6+pVS5_4  | VSY8 + pVS6+pVS5_4 + 25 $\mu$ M pantothenate  | 0.0306           | 0.3894           |
| VSY10               | VSY10 + 25 $\mu$ M pantothenate               | 0.1596           | 0.0092           |



## References

1. Becker J, Boles E. A modified *Saccharomyces cerevisiae* strain that consumes L-arabinose and produces ethanol. *Appl Environ Microbiol.* 2003;69:4144–4150.
2. Tornow J, Santangelo GM. Efficient expression of the *Saccharomyces cerevisiae* glycolytic gene *ADH1* is dependent upon a cis -acting regulatory element (UASRPG) found initially in genes encoding ribosomal proteins. *Gene.* 1990;90:79–85.
3. Capieaux E, Vignais ML, Sentenac A, Goffeau A. (1989). The yeast H<sup>+</sup>-ATPase gene is controlled by the promoter binding factor TUF. *J Biol Chem.* 1989;264:7437–7446.
4. Rodicio R, Heinisch JJ, Hollenberg CP. Transcriptional control of yeast phosphoglycerate mutase-encoding gene. *Gene.* 1993;125:125–133.
